1 Lateral organ diversification in plants mediated by the ALOG protein family of  
2 transcription factors

3

4 Satoshi Naramoto<sup>a\*</sup>, Victor Arnold Shivas Jones<sup>b</sup>, Nicola Trozzi<sup>a,c</sup>, Mayuko Sato<sup>d</sup>,  
5 Kiminori Toyooka<sup>d</sup>, Masaki Shimamura<sup>e</sup>, Sakiko Ishida<sup>f</sup>, Kazuhiko Nishitani<sup>a</sup>,  
6 Kimitsune Ishizaki<sup>g</sup>, Ryuichi Nishihama<sup>f</sup>, Takayuki Kohchi<sup>f</sup>, Liam Dolan<sup>b</sup> and Junko  
7 Kyoizuka<sup>a</sup>

8

9 <sup>a)</sup> Graduate School of Life Sciences, Tohoku University, Sendai, 980-8577, Japan

10 <sup>b)</sup> Department of Plant Sciences, University of Oxford, Oxford OX1 3RB, UK.

11 <sup>c)</sup> Department of Molecular Biology, Department of Plant Physiology, Umeå Plant  
12 Science Centre, Umeå University, Umeå 901 87, Sweden

13 <sup>d)</sup> RIKEN Center for Sustainable Resource Science, Yokohama 230-0045, Japan

14 <sup>e)</sup> Graduate School of Science, Hiroshima University, Higashi-Hiroshima 739-8526,  
15 Japan

16 <sup>f)</sup> Graduate School of Biostudies, Kyoto University, Kyoto 606-8502, Japan

17 <sup>g)</sup> Graduate School of Science, Kobe University, Kobe 657-8501, Japan

18

19 **Abstract**

20 Land plant shoot structures evolved a diversity of lateral organs as morphological  
21 adaptations to the terrestrial environment, in which lateral organs independently evolved  
22 in each lineage in the sporophyte or gametophyte generation. The gametophyte  
23 meristem of the basally-diverging plant *Marchantia polymorpha* produces axes with  
24 non-photosynthetic scale-like lateral organs instead of leaves. Here we report that an  
25 ALOG (Arabidopsis LSH1 and Oryza G1) family protein in Marchantia,  
26 MpTAWAWA1 (MpTAW1), regulates meristem maintenance and lateral organ  
27 development. A mutation in MpTAW1, preferentially expressed in lateral organs,  
28 induces lateral organs with mis-specified identity and increased cell number, and  
29 furthermore, causes defects in apical meristem maintenance. Remarkably, MpTAW1  
30 expression rescued the elongated-spikelet phenotype of a rice mutant of MpTAW1  
31 homologue. This suggests that ALOG genes are co-opted to specify lateral organ  
32 identities in both gametophyte and sporophyte shoots by repressing lateral organ growth.  
33 We propose that the recruitment of ALOG-mediated lateral organ modification was in  
34 part responsible for the convergent evolution of independently-evolved lateral organs  
35 among highly divergent plant lineages and contributed to the morphological  
36 diversification of land plants.

37

## 38 **Introduction**

39           During 470 million years of evolution the body plans of land plants  
40 diversified independently among the gametophyte and sporophyte life stages of  
41 different plant groups. In extant bryophytes, basally-diverging land plants, the  
42 gametophyte is the dominant phase of the life cycle (1, 2). The gametophyte comprises  
43 an axis that develops from a meristem and forms structures in which gametes develop  
44 (antheridiophores and archaegoniophores). In contrast, the sporophyte is dominant in  
45 extant vascular plants. The sporophyte comprises an axial system (shoot or stem) that  
46 develops from a meristem and forms structures in which haploid spores develop.  
47 Therefore, despite their independent evolution, gametophytes and sporophytes develop  
48 axial systems that are produced by apical meristems (3-5).

49           Extant bryophytes and vascular plants develop lateral organs on gametophytes  
50 and sporophytes, respectively. Apical meristems maintain stem cell activity at their  
51 center and iteratively generate lateral organs at the meristem periphery. The  
52 spatio-temporal differences in cell division and expansion in lateral organs contribute to  
53 the morphological diversity of shoot structures in land plants (6-11).

54           The liverwort *Marchantia polymorpha* (*M. polymorpha*) is a bryophyte that forms  
55 an axis that undergoes indeterminate planar growth in the form of a flattened mat of  
56 tissue, called a thallus. The thallus exhibits strong dorsoventrality; gemma cups,  
57 gemmae and air chambers develop on the dorsal side while rhizoids and ventral scales  
58 are formed on the ventral side (Figure 1A) (12-17). Ventral scales cover bundles of  
59 rhizoids that run along the underside of the thallus and facilitate water and nutrient  
60 transport over the ventral surface of thallus (Figure 1B) (12). In the leafy liverworts,  
61 photosynthetic leaves arise next to a tetrahedral single stem cell (apical cell). By  
62 contrast, *M. polymorpha* does not develop photosynthetic leaves. Instead, the ventral  
63 scales alternately develop on the left and right sides of the wedge-shaped apical cell on  
64 the ventral surface in the apical notch near the growing tip of the thallus. The flattened  
65 form, single-cell thickness and bilateral symmetry resemble the leaves in leafy  
66 liverworts (Figure 1C) (12, 13). The ventral scales of *M. polymorpha* are hypothesized  
67 to be homologous to the photosynthetic leaves of the basally-diverging leafy liverworts  
68 (18, 19).

69           The fossil record indicates that the shoot of the earliest known land plants  
70 comprised branching stems without lateral, determinate organs (Kenrick and Crane,

71 1998). Subsequently, determinate lateral organs, which develop from the sides of apical  
72 meristems, evolved. The earliest example of such a lateral organ is the microphyll that  
73 developed on the stems of the sporophyte of *Baragwanathia longifolia*, a lycophyte,  
74 which first appears in the fossil record in the late Silurian (20, 21). No lateral organs are  
75 known from the gametophytes of early bryophytes from the Silurian or Devonian, but  
76 arose subsequently and are found in extant bryophytes. The acquisition and  
77 modification of different lateral organ types are likely to have been morphological  
78 adaptations to the terrestrial environment that increased photosynthetic efficiency, gas  
79 exchange and water transport (10).

80 Mechanisms controlling lateral organ development are well described in  
81 angiosperms such as rice and *Arabidopsis*. However, little is known about the  
82 mechanisms that regulate lateral organ development among bryophytes. Therefore, we  
83 carried out a forward genetic screen for mutants with defective lateral organ  
84 development in the liverwort *M. polymorpha* to define mechanisms that control lateral  
85 organ development in this species. Comparing the roles of the genes that control lateral  
86 organ development in liverworts and angiosperms will identify the mechanisms that  
87 were involved in the independent evolution of analogous lateral organs during land  
88 plant evolution.

89

## 90 **Results**

### 91 **MpTAW1 specifies lateral organ identity during vegetative growth**

92 We isolated two mutants, *vj99* and *vj86*, that produced abnormal green outgrowths from  
93 a population of 105,000 T-DNA transformed *M. polymorpha* (Figure 1D-1G, S1A and  
94 S1B). *vj99* and *vj86* thalli were hyponastic, bending upwards at the thallus margins  
95 unlike wild type (WT) (Figure 1D and 1E, S1C and S1D). A single T-DNA was inserted  
96 into the gene Mapoly0028s0118 in *vj99* and *vj86*, suggesting that defective function of  
97 Mapoly0028s0118 was responsible for the green outgrowths (Figure S1E). To test this  
98 hypothesis, we generated independent mutations in the Mapoly0028s0118 gene by  
99 homologous recombination. Mutants of Mapoly0028s0118 generated by targeted  
100 deletion developed similar phenotypes to those of the *vj99* and *vj86* mutants (Figure  
101 S1F and S1G). To verify that a defect in Mapoly0028s0118 was responsible for the  
102 green outgrowth we transformed mutant *vj99* with a genomic fragment that includes the  
103 full-length Mapoly0028s0118 gene. Transformation of the Mapoly0028s0118 genomic

104 fragment into *vj99* mutants restored WT development, demonstrating that loss of  
105 Mapoly0028s0118 function causes the *vj99* phenotype (Figures S1H-K). Phylogenetic  
106 analysis indicated that Mapoly0028s0118 belongs to the ALOG (*A*rabidopsis *L*SH1 and  
107 *O*ryza *G*1) protein family (Figure S1L). The proteins in this family contain a  
108 DNA-binding domain with weak transcriptional activity (22-24). We named this gene  
109 MpTAWAWA1 (MpTAW1) after the TAWAWA1 (TAW1) gene in rice, an ALOG member  
110 that regulates meristem activity during reproductive growth (25). In addition to the  
111 abnormal green outgrowths, gemma cup spacing is abnormal in the *Mptaw1-1* (*vj99*)  
112 mutant; the distance between neighboring gemma cups is much shorter than the WT  
113 (Figure 1F and 1G).

114 To more precisely define the nature of the green outgrowths, we performed a  
115 phenotypic analysis of *Mptaw1-1* mutants. Outgrowths emerge from the ventral side of  
116 the thallus near the thallus margins and extend beyond the thallus margin in the  
117 *Mptaw1-1* mutant (Figure 2A-2D). These outgrowths resemble ventral scales in a  
118 number of ways. They develop in pairs near the apical notch (Figure 2E, 2F, S2A and  
119 S2B). They are in general a single cell layer thick, although the outgrowths located near  
120 the apical notch occasionally consist of several cell layers (Figure 2G-2I). Outgrowths  
121 located near the apical notch also tend to pile up on one another at the edge of the  
122 ventral surface (Figure 2G and 2I). Furthermore, while outgrowths develop, no ventral  
123 scales form on *Mptaw1-1* mutants (Figure 2C and 2D), suggesting that the outgrowths  
124 are modified ventral scales. Taken together, these data suggest that the outgrowths  
125 formed from the ventral thallus on *Mptaw1* mutants are related to ventral scales.

126 Although similar to ventral scales, these outgrowths possess several substantially  
127 different characteristics. The abnormal outgrowths formed in *Mptaw1-1* mutants are  
128 greener than typical ventral scales (Figure 2J and 2K). There are more cells in  
129 outgrowths than in WT scales (Figures 2G-2I and S2C-S2F). Moreover, the mutant  
130 chloroplasts are larger than in WT and there are more thylakoid membranes in the  
131 mutants than in WT (Figure 2L and 2M). Starch, not seen in WT scales, accumulates in  
132 the green outgrowth in *Mptaw1-1* mutants, suggesting a higher photosynthetic activity  
133 in this tissue (Figure 2L and 2M). Rhizoids never differentiates in the green outgrowths  
134 of the *Mptaw1* mutants unlike wild-type ventral scales (Figures S2G and S2H). Taken  
135 together, these observations indicated that MpTAW1 plays crucial roles in specifying  
136 lateral organs as ventral scales, in which TAW1 inhibits cell division and chloroplast

137 differentiation.

138

### 139 **MpTAW1 activity is required for the maintenance of meristem activity**

140 The WT thallus comprises a bifurcating axis, and gemma cups develop along the  
141 midline of the dorsal surface. When the WT thallus axis bifurcates, a notch containing  
142 an apical cell forms on each of the two new axes (Figure 3A). The distance between  
143 each apical notch increases along with the forward growth of thalli. This process, the  
144 duplication of apical notches and the subsequent elongation of axes with separation of  
145 notches, is termed “axis separation”. Upon bifurcation, adjacent apical notches are  
146 initially pushed away by the growth of tongue-like tissues, named central lobes, and  
147 subsequently further separated concomitant with the axis elongation (Figure 3A) (26).  
148 Gemma cups initiate from dorsal merophytes, clones derived from the cell that are cut  
149 off from the dorsal surface of the apical cell (12), and they are regularly spaced along  
150 the dorsal midline of each axis. Gemma cups are more densely arranged along the  
151 dorsal surface of *Mptaw1* mutants than in WT (Figure 1G). This suggests defects in  
152 gemma cup differentiation or axis development, or both. To address whether *MpTAW1*  
153 is involved in bifurcation or gemma cup differentiation, we analyzed the number of  
154 apices and gemma cups in *Mptaw1* mutants during cultivation. To count meristems we  
155 imaged expression of the *proYUC2A::GUS* construct that is preferentially expressed in  
156 notches (27). The number of apical notches expressing GUS was not significantly  
157 different between WT and *Mptaw1-1* mutants until day 7 of cultivation, although  
158 subsequently, less GUS-expressing apical notches were detected in the *Mptaw1-1*  
159 mutants compared to WT (Figure 3B-3D). This indicates that bifurcation occurs  
160 normally, at least in the early stages of development. In contrast, the density of apical  
161 notches in *Mptaw1-1* mutants was higher than WT at three weeks (Figure S3A and S3B).  
162 Importantly, there is no clear difference in the number of gemma cups between WT and  
163 *Mptaw1* mutants (Figure S3C). These data suggested that the onset of bifurcation, as  
164 well as gemma cup differentiation, are not affected, but that the separation process of  
165 each apical notch is compromised in *Mptaw1* mutants. The lower number of  
166 GUS-positive notches in *Mptaw1* mutants after 7 days of growth may be due to a  
167 secondary effect of slow thalli growth, or technical limitations of counting  
168 densely-clustered apices.

169 The separation of apical notches is dependent on the division and expansion of

170 cells between notches (Figure 3A). We reasoned that defective cell division between the  
171 apical notches in *Mptaw1* mutant thalli leads to defects in apical notch separation. To  
172 test this possibility, we analyzed the cell division activity of *Mptaw1* mutant  
173 gemmalings during 7days' cultivation by applying a 3 h pulse of  
174 5-ethynyl-2'-deoxyuridine (EdU), a thymidine analog that is incorporated into cells  
175 during DNA replication (Figure 3E-3G)(28). The number of cells labelled by EdU was  
176 indistinguishable between the WT and *Mptaw1* mutants in 1-, 2- and 3-d-old  
177 gemmalings (Figures 3G). However, incorporation of EdU was lower in *Mptaw1*  
178 mutants than in WT between days 3 and 7 (Figures 3E-3G). This suggests that rates of  
179 DNA replication were lower in the mutant than in wild type, consistent with the  
180 hypothesis that cell division is reduced in the *Mptaw1* thallus compared to the wild type.  
181 We also compared the cellular organization of apical meristems of *Mptaw1* mutants and  
182 WT. The WT apical meristem comprises a single triangular apical cell and surrounding  
183 merophytes (cells derived from the apical cell), in which the lateral merophytes and the  
184 apical cell display identical shapes (Figure 3H)(12). In contrast, there are many  
185 triangular apical cells in *Mptaw1-1* mutants, in contrast to the single apical cell of wild  
186 type (Figure 3I). While the expression of *proYUC2A:GUS* is restricted to a small area of  
187 the WT apical notch, staining is more dispersed in *Mptaw1* mutants (Figures 3J and 3K).  
188 Occasionally (3 out of 20 gemmalings at 14 days' cultivation) apical meristems are  
189 aborted in *Mptaw1* mutants (Figure S3D, dotted boxes), a phenomenon not observed in  
190 WT in our conditions. These data suggest that MpTAW1 is required for the maintenance  
191 of apical meristems. These data also support the hypothesis that *Mptaw1* mutants fail to  
192 separate apical notches due to defects in cell proliferation in the apical notches. Gemma  
193 cup differentiation as well as bifurcation initiate as in WT, but then subsequent defective  
194 meristem activity causes defective axis expansion, resulting in the development of a  
195 higher density of gemma cups and apical notches in the *Mptaw1* mutant thallus.

196

### 197 **MpTAW1 is expressed in lateral organs but not in apical cells**

198 To define the spatial expression patterns of MpTAW1, we established a line that  
199 expressed GUS under the control of 5' and 3' regulatory elements that were used in the  
200 complementation analysis of *Mptaw1* mutants (Figure S1E). In 4-d-old gemmalings,  
201 GUS staining was detected in notches and rhizoids (Figure 4A). Weak signal was  
202 observed elsewhere in growing thalli (Figures 4B and 4C). The developing ventral

203 scales in the ventral region of the apical notch stained the strongest (Figures 4B-4F).  
204 Staining extended over the entire young ventral scale and the basal region of old ventral  
205 scales (Figures 4D and 4E). No signal was detected in the oldest ventral scales (Figures  
206 4D and 4E). The expression of *MpTAW1* in ventral scales is consistent with the  
207 phenotypic defects seen in these organs in the mutant, further strengthening our  
208 hypothesis that *MpTAW1* is required for development of ventral scales. We also  
209 expressed functional *proMpTAW1:eGFP-MpTAW1* constructs in *Mptaw1-1* mutants  
210 (Figures S1H, S1I and S1K) to analyse the distribution of MpTAW1 protein on a  
211 cellular level. eGFP-MpTAW1 protein was preferentially detected in the ventral parts of  
212 the apical notch regions (Figures 4G, 4H and S4; Supplementary Movie1). In particular,  
213 stronger signals were detected all over the young ventral scales as well as at the basal  
214 region of old ventral scales (Figures 4G, 4H and S4; Supplementary Movie1). These  
215 results further supported a crucial role for MpTAW1 in the specification of lateral  
216 organs as ventral scales. However, eGFP-MpTAW1 proteins were not detected in apical  
217 cells or lateral merophytes despite the defect in apical meristem morphology and  
218 maintenance in *Mptaw1-1* mutants (Figures 4G-4I). These findings suggest that  
219 MpTAW1 mediates the maintenance of apical meristems non-cell-autonomously,  
220 although we cannot exclude the possibility that MpTAW1 proteins below the level of  
221 detection in the apical meristems maintain meristem activity (Figure 4I).

222

### 223 **MpTAW1 specifies lateral organ identity during reproductive growth**

224 *M. polymorpha* produces an umbrella-like gametangiophore (antheridiophore or  
225 archegoniophore) that bears antheridia or archegonia during reproductive growth (12).  
226 The gametangiophore is a vertically growing thallus branch (12) and we reasoned that  
227 gametangiophore development might be defective in *Mptaw1-1* mutants. The  
228 antheridial receptacles of male *Mptaw1-1* plants are smaller than WT and, unlike in the  
229 WT, antheridia are frequently exposed (Figures S5A-S5C). Moreover, the scales on the  
230 antheridial receptacles of *Mptaw1-1* plants are larger than WT (Figures S5D-S5H).  
231 *MpTAW1* expression was detected in the ventral scales of the antheridiophore, as well as  
232 jacket cells, mucilage cells, and throughout the antheridia in plants harboring the  
233 *proMpTAW1::GUS* transgene (Figures S5I and S5J). These observations demonstrate  
234 that MpTAW1 regulates ventral scale development by restricting cell division in both  
235 the vegetative and reproductive phases.



236 The archegonial receptacle of female *M. polymorpha* is highly lobed, with  
237 finger-like structures called digitate rays (Figure 5A). The archegonial receptacle lacks  
238 the rows of typical ventral scales that develop in antheridiophores. Instead, a pair of  
239 specialized scale-like structures called involucre, which are larger than ventral scales,  
240 develop between each digitate ray and enclose the archegonia cluster (Figures 5C and  
241 5D)(12). In female *Mptaw1-2* mutants, large leaf-like structures developed as in  
242 antheridiophores (Figure 5E). Moreover, more than two involucre-like structures  
243 differentiated between each digitate ray (Figures 5C-5F). Importantly, these  
244 involucre-like structures resemble ventral scales in their arrangement in several rows  
245 (Figures 1B, 1C, 5G and 5H). This suggests that loss of MpTAW1 function results in the  
246 homeotic transformation of involucre into more scale-like structures. GUS staining was  
247 also detected in immature involucre but not in mature involucre in *proMpTAW1::GUS*  
248 archegoniophores (Figures 5I and S5K), accompanied by staining of all parts of the  
249 archegonia including eggs, collars and venters (Figures 5I, S5K and S5L). These data  
250 suggest that ventral scales are transformed into involucre in a MpTAW1-dependent  
251 manner upon the transition from vegetative to reproductive growth, in which MpTAW1  
252 inhibits the growth of two rows of ventral scales, resulting in the formation of a single  
253 pair of involucre.

254

### 255 **Molecular function of ALOG proteins are conserved between Marchantia and rice**

256 Mutation of *GI*, a member of the *ALOG* gene family in rice, results in the  
257 enlargement of sterile lemmas; a small leafy lateral organ in the rice spikelet (the basic  
258 unit of a grass flower), which is interpreted as a homeotic transformation of a sterile  
259 lemma into a lemma (22). Similarly, *Mptaw1* mutants display defects in lateral organ  
260 specification, that we interpret as transformation of involucre into ventral scales. To  
261 determine whether the *M. polymorpha* protein could rescue the homeotic transformation  
262 of the rice mutant, we expressed MpTAW1 in rice *gl* mutants. Expression of MpTAW1  
263 restored the WT short sterile lemma phenotype (Figure 6A-6C). This suggests that the  
264 molecular functions of the *ALOG* proteins have been conserved since the time that *M.*  
265 *polymorpha* and rice last shared a common ancestor, which likely lacked lateral organs.  
266 It further suggests that *ALOG* family proteins were independently co-opted to specify  
267 sporophytic function in the lineage giving rise to rice and gametophytic functions in the  
268 lineage giving rise to liverworts, when each originated the evolutionary novelty of

269 lateral organs.

270

## 271 Discussion

### 272 Land plant ALOG proteins regulate lateral organ development and meristem 273 activity

274 Here we report the discovery that MpTAW1 controls both lateral organ  
275 development and apical meristem activity in *M. polymorpha*. MpTAW1 represses the  
276 growth of different lateral organs, including ventral scales and involucre, and MpTAW1  
277 expression was detected early in the development of these lateral structures. These data  
278 indicate that the gene is required for lateral organ development. Furthermore, MpTAW1  
279 activity is required for apical meristem maintenance. However, MpTAW1 is not  
280 expressed in the apical meristems or surrounding cells. We propose that MpTAW1  
281 cell-autonomously regulates lateral organ development but non-cell-autonomously  
282 regulates apical meristem maintenance (Figure 4I).

283 The role of TAW1 proteins in meristem maintenance is conserved between  
284 monocots and dicots. OsTAW1 and SITMF (the tomato TAW1 homolog) proteins  
285 repress maturation of meristems during reproductive growth (23, 25, 29). While the  
286 angiosperm genes control meristem development, neither SITMF, AtLSH3 (the  
287 Arabidopsis TAW1 homolog) nor OsTAW1 proteins are expressed in apical meristems.  
288 Instead they are expressed at lateral organ boundaries (24, 29, 30). Taken together, these  
289 data from a diversity of land plants suggest that while the ALOG genes act  
290 cell-autonomously during the development of lateral organs, they act  
291 non-cell-autonomously to control meristem development. It remains unclear how this  
292 might operate, but there is evidence from angiosperms that lateral organ development is  
293 required for meristem maintenance (8, 31, 32).

294 Taken together with our discovery that MpTAW1 is required  
295 non-cell-autonomously for meristem maintenance in *M. polymorpha*, this means that the  
296 evolutionary-conserved ALOG family proteins control apical meristems in divergent  
297 plant lineages, in which the apical meristems are found in different phase of the life  
298 cycle. We propose that this mechanisms for controlling shoot meristematic activity was  
299 already present in the last common ancestor of Marchantia and rice, the earliest land  
300 plants.

301

## 302 **Conserved ALOG proteins negatively regulating lateral organ growth**

303 We discovered that MpTAW1 specifies lateral organ identity by negatively  
304 regulating the lateral organ outgrowth; involucre are transformed into ventral scale-like  
305 structures during reproductive growth in *Mptaw-1* mutants (Figures 5G and 5H). We  
306 interpret the transformation of involucre into scales as a homeotic transformation, in  
307 the same way that loss-of-function mutations in a homologous gene in rice result in  
308 homeotic transformations in the spikelet. The rice homolog, *G1* also represses the  
309 development of lateral organs to specify the sterile lemmas. Loss-of-function mutations  
310 in *OsG1* result in the transformation of small sterile lemmas into large lemmas (Figures  
311 6A and 6B). This transformation of one member of a meristic series into another  
312 member is designated a homeotic transformation (33). Similarly, *Sltmf* mutants develop  
313 a similar homeotic transformation where sepals develop leaf characteristics (29). The  
314 conserved function of rice, tomato and *M. polymorpha* TAW1 homologs suggests that  
315 the role in lateral organ repression, as evidenced by homeotic transformation in  
316 loss-of-function mutations, is ancient. This functional conservation among divergent  
317 taxa of land plants suggests two alternative hypotheses regarding the evolution of lateral  
318 organs. According to the first hypothesis, the ALOG gene controlled the development of  
319 lateral organs in the last common ancestor of the liverworts and the seed plants. These  
320 structures subsequently diverged morphologically during the course of land plant  
321 evolution. An alternative hypothesis is that the ALOG-dependent growth-repression  
322 mechanism existed in the last land plant common ancestor which lacked lateral organs.  
323 The ALOG mechanism was subsequently recruited independently during the evolution  
324 of lateral organs in different lineages leading to the liverworts and seed plants. Both  
325 hypotheses are consistent with our discovery of the role for ALOG genes in land plants.  
326 However, the currently best-supported hypotheses based on the fossil record is that the  
327 last common ancestor of liverworts and seed plants lacked lateral organs and instead  
328 developed naked shoot axes (34, 35). Lateral organs subsequently evolved  
329 independently in different land plant lineages. If the last common ancestor did not  
330 develop lateral organs and since ALOG function regulates lateral organ development in  
331 both liverworts and seed plants, we suggest that ALOG function was recruited  
332 independently during the evolution of lateral organs in different lineages of land plants.  
333 The recruitment of ALOG function during the independent evolution of lateral organs  
334 provides a molecular mechanism for the convergent evolution of lateral organs.

335

336

337 **ALOG proteins may mediate diversification of lateral organs during plant**  
338 **evolution**

339 It has been suggested that the repressive activity of the *OsG1* gene on growth led to the  
340 evolution of the rice spikelet (22). Loss-of-function *Osg1* mutations revert the sterile  
341 lemma into a larger leafy structure which has been interpreted as similar to a  
342 hypothetical ancestral structure (Figures 6A and 6B) (22). According to this model, the  
343 formation of a pair of lower lemmas subtending the floret (rice flower surrounded by  
344 two bracts; the external lemma and internal palea) was the ancestral state. Then, during  
345 the evolution of rice, *OsG1* activity was co-opted to repress the development of the  
346 lower lemma, which is now much reduced in size in modern rice compared to the  
347 ancestral state, resulting in the formation of the sterile lemma. It is formally possible  
348 that *MpTAW1* may also have played a similar role in the evolution of lateral organs in  
349 liverworts. Several liverwort taxa with thalloid form are suggested to have evolved  
350 independently from ancestral leafy liverworts, where leaves are hypothesized to be  
351 transformed into non-photosynthetic ventral scales with reduced growth during this  
352 evolutionary transition (18, 19). We found that *MpTAW1* is involved in the specification  
353 of lateral organ identities by inhibiting cell division and chloroplast differentiation, and  
354 that the loss of its function leads to the formation of chlorophyll-containing  
355 photosynthetic tissues (Figures 2J and 2K). These green appendages are in fact similar  
356 to the green-colored photosynthetic scales formed in the Treubiaceae family of  
357 liverworts, whose semi-thalloid form has been interpreted as an evolutionary transition  
358 state between the leafy and thalloid form (36-38). Therefore, *MpTAW1* function may  
359 also be associated with the evolution of thallose body form by repressing leaf growth in  
360 ancestral leafy liverworts in the same way that gene *OsG1* suppresses lower lemma  
361 development during rice spikelet evolution. It is possible that morphological  
362 modification of lateral organs is controlled by the spatial and temporal differences in  
363 expression levels of ALOG family genes and this would provide the mechanism for the  
364 establishment of morphological diversification in lateral organs that develop on shoots  
365 during land plant evolution.

366

367

## 368 **Conclusion**

369 We demonstrate that MpTAW1 plays a function in integrating meristem  
370 activity and lateral organ differentiation in *M. polymorpha*. MpTAW1 acts by repressing  
371 lateral organ growth and is required for meristem maintenance. Since ALOG proteins  
372 from angiosperms also repress lateral organ growth and are required for meristem  
373 maintenance, and these functions were rescued by MpTAW1, we conclude that  
374 molecular functions of ALOG family proteins are conserved between among these taxa  
375 and acted in their last common ancestor. We hypothesize that ALOG genes were  
376 co-opted to execute the morphological modification of analogous lateral organs during  
377 land plant evolution and contributed to diversification of lateral organs in shoot systems  
378 during the course of land plant evolution.

379

## 380 **Material and Methods**

381

### 382 **Plant materials and growth conditions**

383 *Marchantia polymorpha* Takaragaike-1 (Tak1, male) and Takaragaike-2 (Tak2, female)  
384 gemmalings were grown for 3–60 days at 22 °C under continuous light on petri plates  
385 containing 1/2 Gamborg's Basal Salt Mixture (B-5) growth medium at pH 5.5 with  
386 1.2 % agar (Nacalai tesque, Japan). Transition to reproductive growth was induced  
387 through far-red light supplementation (39).

388

### 389 **Generation of mutant plants**

390 Knockout mutants of *Mptaw1-1* (*vj99*) and *Mptaw1-2* (*vj86*) were isolated by a mutant  
391 screen of spores from a cross between Tak1 and Tak2 transformed with the T-DNA  
392 vector pCambia1300 as previously described (14, 40). Knockout mutants of *Mptaw1-3*  
393 and *Mptaw1-4* were generated by gene-targeted homologous recombination (41).  
394 Genetic nomenclature is outlined in (42).

395

### 396 **Phylogenetic analysis**

397 Phylogenetic analysis was performed as described by Bowman et al. (5). Protein  
398 sequences were collected using the *Marchantia* genome portal site MarpolBase  
399 (<http://marchantia.info>). Multiple sequence alignments were performed using the  
400 MUSCLE program (43) contained in the Geneious software

401 (<https://www.geneious.com>). Gaps were removed by using Strip Alignment Columns in  
402 the Geneious package and phylogenetic analyses were performed using PhyML  
403 (<http://www.atgc-montpellier.fr/phyml/>).

404

#### 405 **Plasmid construction**

406 For constructing the *proMpTAW1:MpTAW1* plasmid that complements the *Mptaw1*  
407 mutants, an *MpTAW1* genomic fragment with a 10 kb upstream region and a 3 kb  
408 downstream region was amplified by PCR using Prime STAR GXL polymerase  
409 (TaKaRa, Japan) and subcloned into pENTR/D-TOPO (Thermo Fisher Scientific, USA),  
410 which was subsequently integrated into pMpGWB101 by a Gateway LR reaction (44).  
411 pENTR/D-TOPO that included the *proMpTAW1:MpTAW1* complement fragment was  
412 modified to establish *proMpTAW1:eGFP-MpTAW1* and *proMpTAW1:MpTAW1-GUS*  
413 plasmids. A PCR-amplified *eGFP* coding sequence was inserted in frame with the 5'  
414 end of the *MpTAW1* coding sequence by the In-Fusion cloning reaction (TaKaRa,  
415 Japan) to generate the *proMpTAW1:eGFP-MpTAW1* plasmid. The coding sequence of  
416 *MpTAW1* in the *proMpTAW1:MpTAW1* complement fragment was replaced with a  
417 PCR-amplified GUS coding sequence by the In-Fusion cloning reaction to generate  
418 *proMpTAW1:MpTAW1-GUS* plasmids. pENTR/D-TOPO vectors that included  
419 *proMpTAW1:eGFP-MpTAW1* or *proMpTAW1:MpTAW1-GUS* fragments were  
420 subsequently integrated into pMpGWB101 by the Gateway LR reaction.

421

#### 422 **Histochemical GUS staining**

423 GUS staining was performed as described by Naramoto et al. (45), except that 50 mM  
424 sodium phosphate buffer was used. Samples were cleared with 70 % ethanol and  
425 subsequently mounted using a clearing solution (chloral hydrate:glycerol:water, 8:1:2)  
426 for direct microscopic observation or dehydrated through a graded ethanol series and  
427 embedded in paraffin or Technovit 7100 resin for microtome sectioning.

428

#### 429 **Plant embedding and sectioning**

430 Plant material was fixed in FAA (45 % ethanol:5 % formaldehyde:5 % acetic acid in  
431 water) for embedding in paraffin and Technovit 7100. For paraffin embedding, fixed  
432 plant material was dehydrated in a series of ethanol (25–50 %), t-butyl alcohol (10–  
433 75 %) and chloroform (20 %) solutions, then embedded in Paraplast (McCormick,

434 USA). For Technovit 7100 embedding, fixed sample was dehydrated through a graded  
435 ethanol series and embedded in Technovit 7100 resin, according to the manufacturer's  
436 instructions (Heraeus Kulzer, Germany). Embedded samples were sectioned on a rotary  
437 microtome into a series of vertical transverse and longitudinal sections (thickness of 8  
438  $\mu\text{m}$  for paraffin and 4  $\mu\text{m}$  for technovit sectioning). The obtained sections were further  
439 treated with neutral red dyes as a counterstain for GUS-stained samples or toluidine  
440 blue for the other samples. Multi-Mount 480 solution (MATSUNAMI, Japan) or  
441 Entellan new (MERCK, USA) were used as mounting agents to preserve the samples on  
442 the slides.

443

#### 444 **ClearSee treatment and staining of cell walls**

445 Plants were fixed with 4 % paraformaldehyde (PFA) in 1x PBS for 1 h at room  
446 temperature under vacuum. Samples were subsequently washed twice with PBS and  
447 transferred to ClearSee solution (10 % xylitol, 15 % sodium deoxycholate and 25 %  
448 Urea in water) (46). ClearSee treatment was prolonged until samples became  
449 transparent. Cell walls were stained for 1 h with 0.1 % (v/v) Calcofluor or with 0.1 %  
450 (w/v) Direct Red23, dissolved in ClearSee. Stained samples were washed for at least 30  
451 min with ClearSee solution before observation.

452

#### 453 **EdU uptake experiments**

454 Gemmalings were incubated in 1/2 B5 medium containing 10 $\mu\text{M}$  EdU (Click-iT Edu  
455 Alexa Fluor 488 imaging kit; Thermo Fisher, USA) for 3h. Samples were fixed with  
456 4 % PFA in 1 x PBS for 1 h under vacuum and then washed three times in PBS.  
457 Coupling of EdU to the Alexa Fluor substrate was performed according to the  
458 manufacturer's instructions. Before observations, samples were cleared with ClearSee  
459 solution and cell walls were subsequently stained by Direct Red 23.

460

#### 461 **Microscopy**

462 Anatomical features were observed with a light microscope (Olympus BX51) equipped  
463 with an Olympus DP71, a light sheet microscope (Zeiss Z.1) or a confocal laser  
464 scanning microscope (Olympus FV1000 or Zeiss LSM880). For light microscope  
465 observations, a PLAPON 2x objective, a UPlanFl 10x objective or a UPlanFl 20x  
466 objective were used. Light sheet microscope observations were conducted using

467 Lightsheet Z.1 detection optics 5x or Clr Plan-Neofluar 20x. For confocal laser  
468 scanning microscopy, cell walls stained by Calcofluor or by Direct Red23 were excited  
469 at 405 nm or 543 nm, respectively, whereas GFP and Alexa 488-labelled EdU were  
470 excited at 488 nm. Samples were mounted using ClearSee solution and observed with  
471 silicon oil objectives. The 3D reconstruction was done by using Imaris software  
472 (BITPLANE, <http://www.bitplane.com/>). High-resolution images showing  
473 ultrastructural details were obtained using a Scanning Electron Microscope (JEOL  
474 JCM-6000Plus NeoScope) and Hitachi SU820.

475

#### 476 **Acknowledgements**

477 We thank Kei Saito, Eriko Kida and Kanane Sato for assistance with transformation and  
478 microtome sectioning. We also thank Mayumi Wakazaki for preparing samples for  
479 electron microscopy. This work is supported by Grants-in-Aid from the Ministry of  
480 Education, Culture, Sports and Technology, Japan (KAKENHI grant numbers  
481 17K17595 for S.N., 18H04836 for R.N., 17H06472 for K.I. and 17H06465 for J.K.).  
482 V.A.S.J. was funded by a Newton Abraham Studentship from the University of Oxford.  
483 LD was funded by an ERC advanced Grant EVO-500 (250284).

484

#### 485 **Author contributions**

486 S.N. carried out the majority of experiments. V.J. and L.D. isolated *vj99* and *vj86*  
487 mutants. S.N. and N.T. conducted SEM and GUS analyses. M.S. and K.T. conducted  
488 TEM analyses. S.N., V.J., M.S., S.I., K.N., K.I., R.N., T.K. L.D, and J.K. analyzed data.  
489 S.N., V.J., M.S., L.D., and J.K. designed the project. S.N., V.J., M.S., L.D., and J.K.  
490 wrote the manuscript.

491

#### 492 **Conflict of interest**

493 The authors declare that they have no conflict of interest.

494

#### 495 **Figure Legends**

496

497 **Figure 1. Illustration of *M. polymorpha* thallus and the isolation of *Mptaw1* mutants**  
498 (A-C) Diagrammatic representation of vegetative *M. polymorpha* thallus. Gross  
499 morphology (A), ventral side of thallus with ventral scales arranged in three rows on



500 each side of the thallus (B), and vertical transverse section of a notch region (C).  
501 Rhizoids are not shown in (B) to clearly visualize ventral scales. The apical cell is  
502 shaded in (C).

503 (D-G) Gross morphology of the wild-type (WT) Tak1 (D and F) and the *Mptaw1-1*  
504 mutant *vj99* (E and G) gemmalings. 10-d-old gemmalings (D and E) and 3-w-old (F and  
505 G) thalli are shown. The dotted square box in (G) that includes the abnormal green  
506 outgrowth is enlarged in the image in the top right corner. Arrowheads indicate  
507 abnormal green outgrowths. Note that unlike WT, *Mptaw1* mutants displayed upward  
508 bending of thalli and formed green outgrowths.  
509 Scale bars = 1 mm in (D and E), 0.5 cm in (F and G).

510

### 511 **Figure 2. MpTAW1 functions are required for specification of lateral organs**

512 (A-D) SEM images of WT (A and C) and the *Mptaw1* mutant (B and D) thalli. Dorsal  
513 (A and B) and ventral (C and D) sides of thalli are shown. Ventral scales in (C) and  
514 greenish outgrowth in (D) are highlighted in yellow and red, respectively.

515 (E-I) LSFM (Light sheet fluorescence microscopy) images of WT (E and G) and  
516 *Mptaw1* mutants (F, H and I). Observation of apical notch regions from the ventral side  
517 (E and F) revealed the role of MpTAW1 in specifying lateral organs as ventral scales  
518 (F). Vertical longitudinal optical sections (G-I) around apical notches identified  
519 accelerated cell division of lateral organs in *Mptaw1* mutants (H and I). Lateral organs  
520 are indicated by arrows in (E and F) and highlighted in red or blue in (G-I).

521 (J and K) Images of ventral scales in WT (J) and the corresponding tissues in *Mptaw1*  
522 mutants (K). Note that ventral scale cells are transformed into green tissues that lack  
523 mucilage hair cells in *Mptaw1* mutants. Mucilage hair in WT is indicated by an arrow in  
524 (J).

525 (L and M) TEM images of ventral scale cells in WT (L) and the corresponding cells in  
526 *Mptaw1* mutants (M). Note that ventral scale cells are transformed into photosynthetic  
527 cells in *Mptaw1* mutants.

528 Scale bars = 1.5 mm in (A-D), 150 $\mu$ m in (E and F), 300  $\mu$ m in (G-I), 200  $\mu$ m in (J and  
529 K) and 2  $\mu$ m in (L and M).

530

### 531 **Figure 3. Loss-of-function mutant of MpTAW1 displays defects in meristem** 532 **maintenance**

533 (A) Diagrammatic representation of thallus shape transition in *M. polymorpha* thallus  
534 development. Note that distances between each apical notch as well as gemma cups are  
535 gradually increased along with the progression of bifurcation. Red squares and black  
536 circles indicate apical cells and gemma cups, respectively.

537 (B and C) Apices stained by *proYUC2A:GUS* in 10-d-old gemmalings in WT (Tak1)  
538 (B) and *Mptaw1* mutants (C). Arrowheads indicate GUS staining at apical notches.

539 (D) The number of apices stained by *proYUC2A:GUS* in *Mptaw1* mutants as compared  
540 to Tak1 throughout 14 d of gemmaling growth. The structure of a gemma is  
541 symmetrical, with a single notch on either sides. The number of apices originating from  
542 one side of each gemma (hereafter referred to as a “half gemmaling”) was counted.  
543 Each time point indicates the mean +/- SD. At least 14 gemmalings were analyzed at  
544 each time point. P values lower than 0.01 were indicated by asterisks (\*).

545 (E-G) Cell division activities in *Mptaw1* mutants decreased after 3 days' incubation.  
546 EdU-positive signals of 4-d-old gemmalings in Tak1 (E) and *Mptaw1* mutants (F) are  
547 shown in green. (G) EdU uptake activities of Tak1 and *Mptaw1* mutants at the indicated  
548 time points. Edu-positive signals detected within half gemmalings were counted. Each  
549 time point indicates the mean +/- SD. At least 8 gemmalings were analyzed at each time  
550 point. P values lower than 0.01 are indicated by asterisks (\*).

551 (H-K) Defective apical meristem structures in *Mptaw1* mutants.

552 A single apical cell, as seen in 3-d-old Tak1 gemmalings (H) was not observed in  
553 *Mptaw1* mutants (I). GUS staining of *proYUC2A:GUS* gemmalings in the apical notch  
554 region was broader in *Mptaw1* mutants (K) as compared to Tak1 (J). Plasma  
555 membranes (PMs) in (H) and (I) were labelled by *proEF:Lti6-GFP* constructs.  
556 Asterisks indicate triangular cells that are either apical cells or lateral merophytes.

557 Scale bars = 500  $\mu$ m in (B and C), 200  $\mu$ m in (E and F), 20  $\mu$ m in (H and I) and 100  $\mu$ m  
558 in (J and K).

559

560 **Figure 4. MpTAW1 regulates lateral organ development cell-autonomously and**  
561 **meristem maintenance non-cell-autonomously**

562 (A-C) GUS activity in ventral thalli of 4-d-old (A) and 10-d-old (B and C)  
563 *proMpTAW1:GUS*-expressing gemmalings. (C) is a close-up image of the dotted square  
564 depicted in (B).

565 (D-F) Cross-section of GUS-stained 10-d-old *proMpTAW1:GUS* gemmalings. (D and  
566 E) are vertical longitudinal sections and (F) is a vertical transverse section. (E) is a  
567 close-up image of the dotted square depicted in (D). “young” and “old” describe in (D)  
568 indicates the relative age of ventral scales.

569 (G and H) Functional eGFP-MpTAW1 proteins were not detected in apical meristems  
570 but were detected in ventral scales and the cells beneath the basal part of ventral scales.  
571 Confocal images of a horizontal optical section (G) and a vertical longitudinal optical  
572 section (H) of *Mptaw1* mutant gemmalings that express *proMpTAW1:eGFP-MpTAW1*  
573 constructs are shown. Cell walls were stained by calcofluor. Apical cells are indicated  
574 by asterisks and/or dotted yellow lines. “yvs” and “ovs” indicates young ventral scales  
575 and old ventral scales, respectively.

576 (I) Schematic of MpTAW1 protein localization around apical notches. MpTAW1  
577 proteins are detected at ventral scales and the cells that are located around the basal part  
578 of ventral scales. Note that MpTAW1 protein is not present in apical cells. Green  
579 indicates cells that contain MpTAW1 protein. The apical cell is in pink.

580 Scale bars = 500  $\mu$ m in (A, B and D), 200  $\mu$ m in (F) and 50  $\mu$ m in (G and H).

581

582 **Figure 5. MpTAW1 is necessary for the specification of lateral organ identity**  
583 **during reproductive growth**

584 (A and B) SEM images of the dorsal side of archegoniophores in WT Tak2 (A) and in  
585 *Mptaw1* mutants (B). Note that archegoniophores in *Mptaw1* mutants display shorter,  
586 malformed finger-like structures in place of digitate rays.

587 (C-F) SEM images of the ventral side of archegoniophores in WT (C and D) and in  
588 *Mptaw1* mutants (E and F). (D) and (F) are magnified images of (C) and (E),  
589 respectively. Instead of a single pair of involucres as developed by the WT (C and D),  
590 three pairs of membranous structures developed in *Mptaw1* mutants (E and F). Enlarged  
591 leaf-like structures (highlighted in green) also developed in *Mptaw1* mutants (E).  
592 Involucres in WT and the three pairs of membranous structures in *Mptaw1* mutants are  
593 highlighted in yellow, red or blue.

594 (G and H) Cross-sections of archegonial receptacles at regions between the digitate rays  
595 in WT (G) and in *Mptaw1* mutants (H). Note the three pairs of ventral scale-like  
596 membranous structures in *Mptaw1* mutants. Arrows indicate involucres or ventral  
597 scale-like structures.

598 (I) Cross-sections of GUS-stained archegoniophores that express *proMpTAWI:GUS*.  
599 GUS activity was detected in immature involucre.  
600 Scale bars = 2 mm in (A, B, C and E), 400  $\mu$ m in (D and F) and 200  $\mu$ m in (G, H and I).

601

602 **Figure 6. Evolutionarily-conserved ALOG family proteins in Marchantia and in**  
603 **rice are co-opted to specify analogous lateral organs**

604 (A-C) Complementation of rice *alog* mutants with *MpTAWI*. Phenotypes of a WT (A),  
605 a *gl* mutant (B) and a *gl* mutant expressing the *35Spro::MpTAWI* construct (C) are  
606 shown.

607 Scale bars = 2 mm in (A, B and C).

608

609 **Supplementary Figures**

610

611 **Figure S1. Responsible gene of *vj99* mutant encodes an ALOG family protein**  
612 **(related to Figure 1).**

613 (A and B) Phenotypes of *vj99* and *vj86* mutants.

614 (C and D) LSFM image of gross morphology of WT (C) and *vj99* mutant (D)  
615 gemmalings.

616 (E) Overview of the functional *MpTAWI* construct and the T-DNA insertion mutants  
617 isolated by forward genetic screening. The regions that harbor 10152 bp upstream and  
618 1689 downstream of coding sequences were used to express *MpTAWI*.

619 (F and G) Phenotypic series of *MptawI* knockout mutants.

620 (H-K) Complementation of *MptawI* mutants with a functional *MpTAWI* construct. The  
621 phenotype of *MptawI-1* (I) is complemented by introducing the genomic *MpTAWI*  
622 fragment (J) as well as the *eGFP*-fused *MpTAWI* genomic fragment (K).

623 (L) Phylogenetic tree of ALOG family proteins in Arabidopsis, rice and Marchantia.  
624 Green, red and blue symbols indicate ALOG proteins in Arabidopsis, rice and  
625 Marchantia, respectively.

626 Scale bars = 1cm in (A, B, F, G, H, I, J and K), 500  $\mu$ m in (C and D).

627

628 **Figure S2. The mutation in *MpTAWI* transforms ventral scales into**  
629 **chlorophyll-containing photosynthetic tissues with an increased number of cells.**  
630 **(related to Figure 2).**

631 (A and B) LSFM image of gemmalings in WT (A) and in *Mptaw1* mutants (B)  
632 observed from the ventral side. Dotted boxes in (A) and (B) that include apical notch  
633 regions are shown as close-up images in Figure 2 (E) and (F), respectively. Ventral  
634 scales in WT or their corresponding tissues in *Mptaw1* mutants are indicated by arrows.  
635 (C-F) Vertical transverse optical sections of apical notch regions in 4-d-old gemmalings  
636 obtained by LSFM. Optical sections in WT (C and D) and in *Mptaw1* mutants (E and F)  
637 are shown. Note that the number of cells that comprise mucilage and ventral scales  
638 increased and thus these tissues became larger in *Mptaw1* mutants.  
639 (G and H) Images of ventral scales in WT (G) and the corresponding tissues in *Mptaw1*  
640 mutants (H). Note that ventral scale cells are transformed into green tissues that lack  
641 rhizoids and mucilage hair cells in *Mptaw1* mutants. Rhizoids and mucilage hair in WT  
642 are indicated by an arrowhead and an arrow, respectively.  
643 Scale bars = 150  $\mu\text{m}$  in (A and B), 100  $\mu\text{m}$  in (C and E) and 200  $\mu\text{m}$  in (G and H).

644

645 **Figure S3. MpTAW1 plays crucial roles in maintenance of meristem activities**  
646 **(related to Figure 3).**

647 (A and B) Apices stained by *proYUC2A:GUS* in 3-w-old-gemmalings in WT (A) and  
648 *Mptaw1* mutants (B). Arrowheads indicate GUS staining at apical notches. (C) Number  
649 of gemma cups in WT Tak1 and in *Mptaw1* mutants. Each bar indicates the mean +/-  
650 SD. At least 7 gemmalings were analyzed at each time point.

651 (D) SEM image of *Mptaw1* mutant gemmalings. Note the frequent termination of  
652 meristem activity which accompanies thalli regeneration in *Mptaw1* mutants. The  
653 meristems presumed to be aborted are indicated by dotted boxes.

654 Scale bars = 1.5 mm in (A and B) and 1 mm in (D).

655

656 **Figure S4. Functional eGFP-MpTAW1 proteins were detected in ventral scales**  
657 **and the cells beneath the basal part of the ventral scales (related to Figure 4).**

658 Confocal laser scanning microscopy (CLSM) image of *Mptaw1* mutant gemmalings  
659 that express *proMpTAW1:eGFP-MpTAW1* constructs. Vertical transverse sections were  
660 obtained after the 3D reconstruction of a series of CLSM images. Cell walls were  
661 stained by calcofluor.

662 Scale bar = 50  $\mu\text{m}$ .

663

664 **Figure S5. MpTAW1 plays crucial roles in lateral organ differentiation in**  
665 **reproductive growth (related to Figure 5).**

666 (A-F) SEM image of antheridiophores in WT Tak1 (A and D) and *Mptaw1* mutants (B,  
667 C, E and F). The dorsal side (A-C) and ventral side (D-F) of antheridiophores are shown.  
668 (C) and (F) are close-up images of (B) and (E), respectively. Some ventral scales are  
669 highlighted by colors. Note the exaggerated growth of ventral scales as compared to the  
670 size of thalli (F).

671 (G and H) Vertical sections of antheridia in WT (G) and *Mptaw1* mutants (H). Note the  
672 extra cell division of mis-specified ventral scales in *Mptaw1* mutants. Ventral scales (G)  
673 and mis-specified ventral scales (H) are indicated by arrows.

674 (I and J) Cross-sections of GUS-stained antheridiophores (I) and antheridia (J) that  
675 express *proMpTAW1:GUS* constructs. Note that GUS activities were detected in the  
676 ventral scales in WT (I).

677 (K and L) Cross-sections of GUS-stained archegoniophores that express  
678 *proMpTAW1:GUS*. Regions that include mature involucre (K) and whole image of  
679 archegoniophores (L) are shown. Note that in contrast to immature archegoniophores,  
680 GUS activity was not detected in mature involucre.

681 Scale bars = 2 mm in (A,B and E), 1mm in (F), 400  $\mu$ m in (C), 200  $\mu$ m in (G,H,I,K and  
682 L).

683

684

685 **Supplemental Movie 1. 3D reconstruction of the apical notch region by using**  
686 **CLSM data that display eGFP-MpTAW1 and cell walls.**

687 Cell walls were stained by calcofluor.

688

689 **References**

- 690 1. Nishiyama T, *et al.* (2003) <Comparative genomics of *Physcomitrella*  
691 *patens* gametophytic transcriptome and *Arabidopsis thaliana*-  
692 Implication for land plant evolution.pdf>. *PNAS* 100:8007–8012.
- 693 2. Puttick MN, *et al.* (2018) The Interrelationships of Land Plants and  
694 the Nature of the Ancestral Embryophyte. *Curr Biol* 28(5):733–745  
695 e732.
- 696 3. Prigge MJ & Bezanilla M (2010) Evolutionary crossroads in  
697 developmental biology: *Physcomitrella patens*. *Development*  
698 137(21):3535–3543.
- 699 4. Frank MH & Scanlon MJ (2015) Transcriptomic evidence for the  
700 evolution of shoot meristem function in sporophyte-dominant land  
701 plants through concerted selection of ancestral gametophytic and  
702 sporophytic genetic programs. *Mol Biol Evol* 32(2):355–367.
- 703 5. Bowman JL, *et al.* (2017) Insights into Land Plant Evolution Garnered  
704 from the *Marchantia polymorpha* Genome. *Cell* 171(2):287–304 e215.
- 705 6. von Goethe JW (1790) Versuch die Metamorphose der Pflanzen zu  
706 erklären. *Gotha:C. W. Ettinger*.
- 707 7. Tsukaya H (1995) “The genetic control of morphogenesis in *Arabidopsis*  
708 and its relevance to the developmental biodiversity”. In  
709 *Biodiversity and Evolution. Edited by Arani, R., Kato, M. and Doi,*  
710 *Y., The National Science Museum Foundation, Tokyo:253–265.*
- 711 8. Shi B, *et al.* (2018) Feedback from Lateral Organs Controls Shoot  
712 Apical Meristem Growth by Modulating Auxin Transport. *Dev Cell*  
713 44(2):204–216 e206.
- 714 9. Honma T & Goto K (2001) Complex of MADS-box proteins are sufficient  
715 to convert leaves into floral organs. *Nature* 409:525–529.
- 716 10. Harrison CJ & Morris JL (2018) The origin and early evolution of  
717 vascular plant shoots and leaves. *Philos Trans R Soc Lond B Biol Sci*  
718 373(1739).
- 719 11. Bell AD (2008) Plant Form: An Illustrated Guide to Flowering Plant  
720 Morphology. *Portland: Timber Press*.

- 721 12. Shimamura M (2016) *Marchantia polymorpha*: Taxonomy, Phylogeny and  
722 Morphology of a Model System. *Plant Cell Physiol* 57(2):230–256.
- 723 13. McConaha M (1941) Ventral Structures Effecting Capillarity in the  
724 Marchantiales. *Amer. J. Bot.* 28:301–306.
- 725 14. Jones VA & Dolan L (2017) MpWIP regulates air pore complex development  
726 in the liverwort *Marchantia polymorpha*. *Development*  
727 144(8):1472–1476.
- 728 15. Duckett JG, Ligrone, R., Renzaglia, K., and Pressel, S. (2014) Pegged  
729 and soomth rhizoids in complex thalloid liverworts  
730 (*Marchantiopsida*): structure, function and evolution. *Botanical*  
731 *Journal of the Linnean Society* 174:68–92.
- 732 16. Barnes CR & Land WJG (1908) Bryological Papers. II. The origin of  
733 the cupule of *Marchantia*. *Bot Gaz* 46:401–409.
- 734 17. Barnes CR & Land WJG (1907) Bryological Papers. I. The origin of air  
735 chambers. *Bot Gaz* 44:197–213.
- 736 18. Mehra PN (1957) A new suggestion on the origin of thallus in the  
737 Marchantiales. II. The Theory. *Amer. J. Bot.* 44:573–581.
- 738 19. Mehra PN (1957) A new suggestion on the origin of thallus in the  
739 Marchantiales. I. The thallus structure. *Amer. J. Bot.* 44:505–513.
- 740 20. Fanning U, Edwards D, & Richardson JB (1990) Further evidence for  
741 diversity in late Silurian land vegetation. *Journal of the Geological*  
742 *Society, London* 147:725–728.
- 743 21. Lang WH & Cookson IC (1935) On a flora, including vascular land plants,  
744 associated with monograptus, in rocks of silurian age, from victoria,  
745 austria. *Philos Trans R Soc Lond B Biol Sci* 224(517):421–449.
- 746 22. Yoshida A, Suzaki T, Tanaka W, & Hirano H (2009) The homeotic gene  
747 long sterile lemma (G1) specifies sterile lemma identity in the rice  
748 spikelet. *Proc Natl Acad Sci U S A* 106:20103–20108.
- 749 23. Xu C, Park SJ, Eck JV, & Lippman ZB (2018) Control of inflorescence  
750 architecture in tomato by BTB/POZ transcriptional regulators. *Genes*  
751 *Dev* 30:2048–2061.



- 752 24. Takeda S, *et al.* (2011) CUP-SHAPED COTYLEDON1 transcription factor  
753 activates the expression of LSH4 and LSH3, two members of the ALOG  
754 gene family, in shoot organ boundary cells. *Plant J* 66(6):1066–1077.
- 755 25. Yoshida A, *et al.* (2013) TAWAWA1, a regulator of rice inflorescence  
756 architecture, functions through the suppression of meristem phase  
757 transition. *Proc Natl Acad Sci U S A* 110:767–772.
- 758 26. Solly JE, Cunniffe NJ, & Harrison CJ (2017) Regional Growth Rate  
759 Differences Specified by Apical Notch Activities Regulate Liverwort  
760 Thallus Shape. *Curr Biol* 27(1):16–26.
- 761 27. Eklund DM, *et al.* (2015) Auxin Produced by the Indole-3-Pyruvic Acid  
762 Pathway Regulates Development and Gemmae Dormancy in the Liverwort  
763 *Marchantia polymorpha*. *Plant Cell* 27(6):1650–1669.
- 764 28. Nakayama H, *et al.* (2014) Regulation of the KNOX-GA gene module  
765 induces heterophyllic alteration in North American lake cress. *Plant*  
766 *Cell* 26(12):4733–4748.
- 767 29. MacAlister CA, *et al.* (2012) Synchronization of the flowering  
768 transition by the tomato TERMINATING FLOWER gene. *Nat Genet*  
769 44(12):1393–1398.
- 770 30. Bencivenga S, Serrano-Mislata A, Bush M, Fox S, & Sablowski R (2016)  
771 Control of Oriented Tissue Growth through Repression of Organ  
772 Boundary Genes Promotes Stem Morphogenesis. *Dev Cell* 39(2):198–208.
- 773 31. Eshed Y, Baum SF, Perea JV, & Bowman JL (2001) Establishment of  
774 polarity in lateral organs of plants. *Curr Biol* 11:1251–1260.
- 775 32. Goldshmidt A, Alvarez JP, Bowman JL, & Eshed Y (2008) Signals derived  
776 from YABBY gene activities in organ primordia regulate growth and  
777 partitioning of *Arabidopsis* shoot apical meristems. *Plant Cell*  
778 20(5):1217–1230.
- 779 33. Bateson W (1894) Materials for the study of variation treated with  
780 especial regard to discontinuity in the origin of species. *London,*  
781 *Macmillan and co., 1894.*
- 782 34. Kenrick P & Crane PR (1997) The origin and early evolution of plants  
783 on land. *Nature* 389:33–39.

- 784 35. Kenick P & Crane PR (1997) The origin and early diversification of  
785 land plants. A cladistic study. *Washington, DC: Smithsonian*  
786 *Institute Press.*
- 787 36. Renzaglia KS (1982) <A comparative developmental investigation of  
788 the gametophyte generation in the Metzgeriales (Hepatophyta).  
789 *Bryophytorum Bibliotheca*:1–253.
- 790 37. Schuster RM & Scott GAM (1969) A study of the family Treubiaceae  
791 (Hepaticae; Metzgeriales). *Jour. Hattori Bot. Lab.* 32:219–268.
- 792 38. Simamura M, Shigeto Y, & Deguchi H (2003) Study on gametophyte  
793 morphology of Apotreubia (Bryophyte; Hepaticae). *Hikobia*  
794 14:107–112.
- 795 39. Inoue K, Nishihama R, Araki T, & Kohchi T (2019) Reproductive  
796 Induction is a Far-Red High Irradiance Response that is Mediated by  
797 Phytochrome and PHYTOCHROME INTERACTING FACTOR in *Marchantia*  
798 *polymorpha*. *Plant Cell Physiol* 60(5):1136–1145.
- 799 40. Honkanen S, *et al.* (2016) The Mechanism Forming the Cell Surface of  
800 Tip-Growing Rooting Cells Is Conserved among Land Plants. *Curr Biol*  
801 26(23):3238–3244.
- 802 41. Ishizaki K, Johzuka-Hisatomi Y, Ishida S, Iida S, & Kohchi T (2013)  
803 Homologous recombination-mediated gene targeting in the liverwort  
804 *Marchantia polymorpha* L. *Sci Rep* 3(1532).
- 805 42. Bowman JL, *et al.* (2016) The Naming of Names: Guidelines for Gene  
806 Nomenclature in *Marchantia*. *Plant Cell Physiol* 57(2):257–261.
- 807 43. Edger PP & Pires JC (2009) Gene and genome duplications: the impact  
808 of dosage-sensitivity on the fate of nuclear genes. *Chromosome Res*  
809 17(5):699–717.
- 810 44. Ishizaki K, *et al.* (2015) Development of Gateway Binary Vector Series  
811 with Four Different Selection Markers for the Liverwort *Marchantia*  
812 *polymorpha*. *PLoS One* 10(9):e0138876.
- 813 45. Naramoto S, *et al.* (2014) VAN4 encodes a putative TRS120 that is  
814 required for normal cell growth and vein development in *Arabidopsis*.  
815 *Plant Cell Physiol* 55(4):750–763.

- 816 46. Kurihara D, Mizuta Y, Sato Y, & Higashiyama T (2015) ClearSee: a rapid  
817 optical clearing reagent for whole-plant fluorescence imaging.  
818 *Development* 142 (23) :4168–4179.  
819  
820

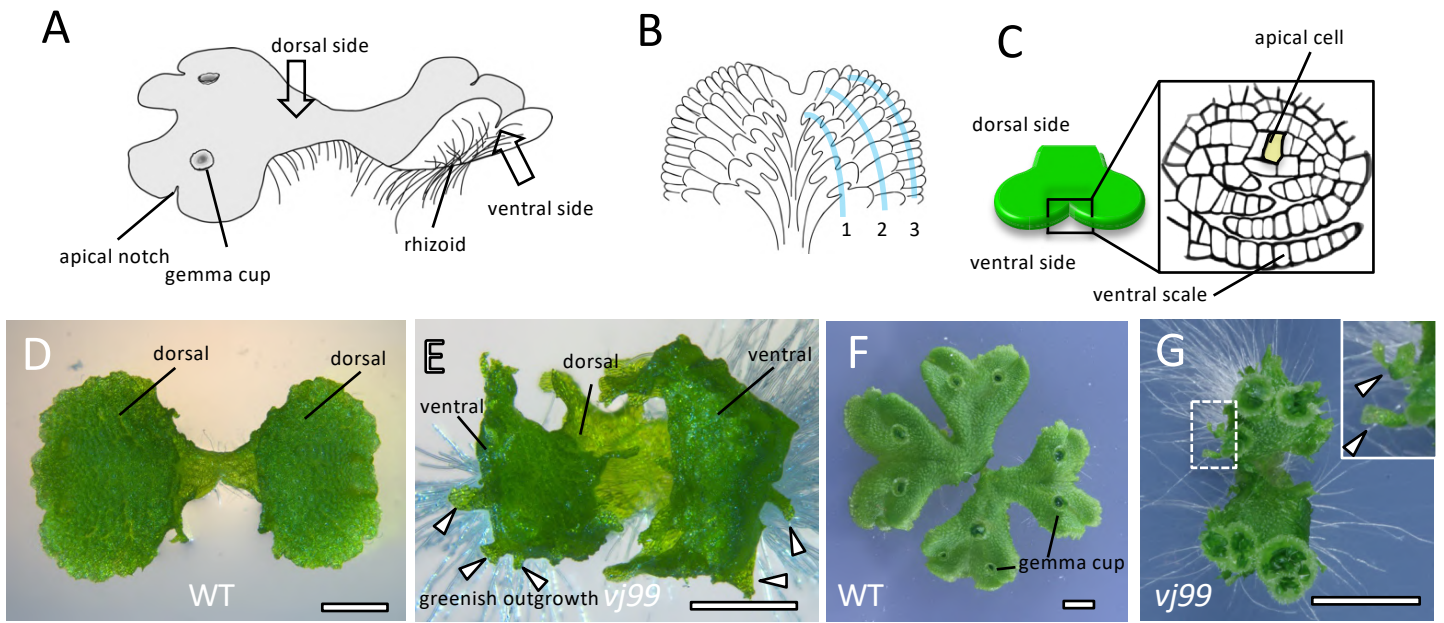

**Figure 1. Illustration of *M. polymorpha* thallus and the isolation of *Mptaw1* mutants**

(A-C) Diagrammatic representation of vegetative *M. polymorpha* thallus. Gross morphology (A), ventral side of thallus with ventral scales arranged in three rows on each side of the thallus (B), and vertical transverse section of a notch region (C). Rhizoids are not shown in (B) to clearly visualize ventral scales. The apical cell is shaded in (C).

(D-G) Gross morphology of the wild-type (WT) Tak1 (D and F) and the *Mptaw1-1* mutant *vj99* (E and G) gemmalings. 10-d-old gemmalings (D and E) and 3-w-old (F and G) thalli are shown. The dotted square box in (G) that includes the abnormal green outgrowth is enlarged in the image in the top right corner. Arrowheads indicate abnormal green outgrowths. Note that unlike WT, *Mptaw1* mutants displayed upward bending of thalli and formed green outgrowths.

Scale bars = 1 mm in (D and E), 0.5 mm in (F and G).

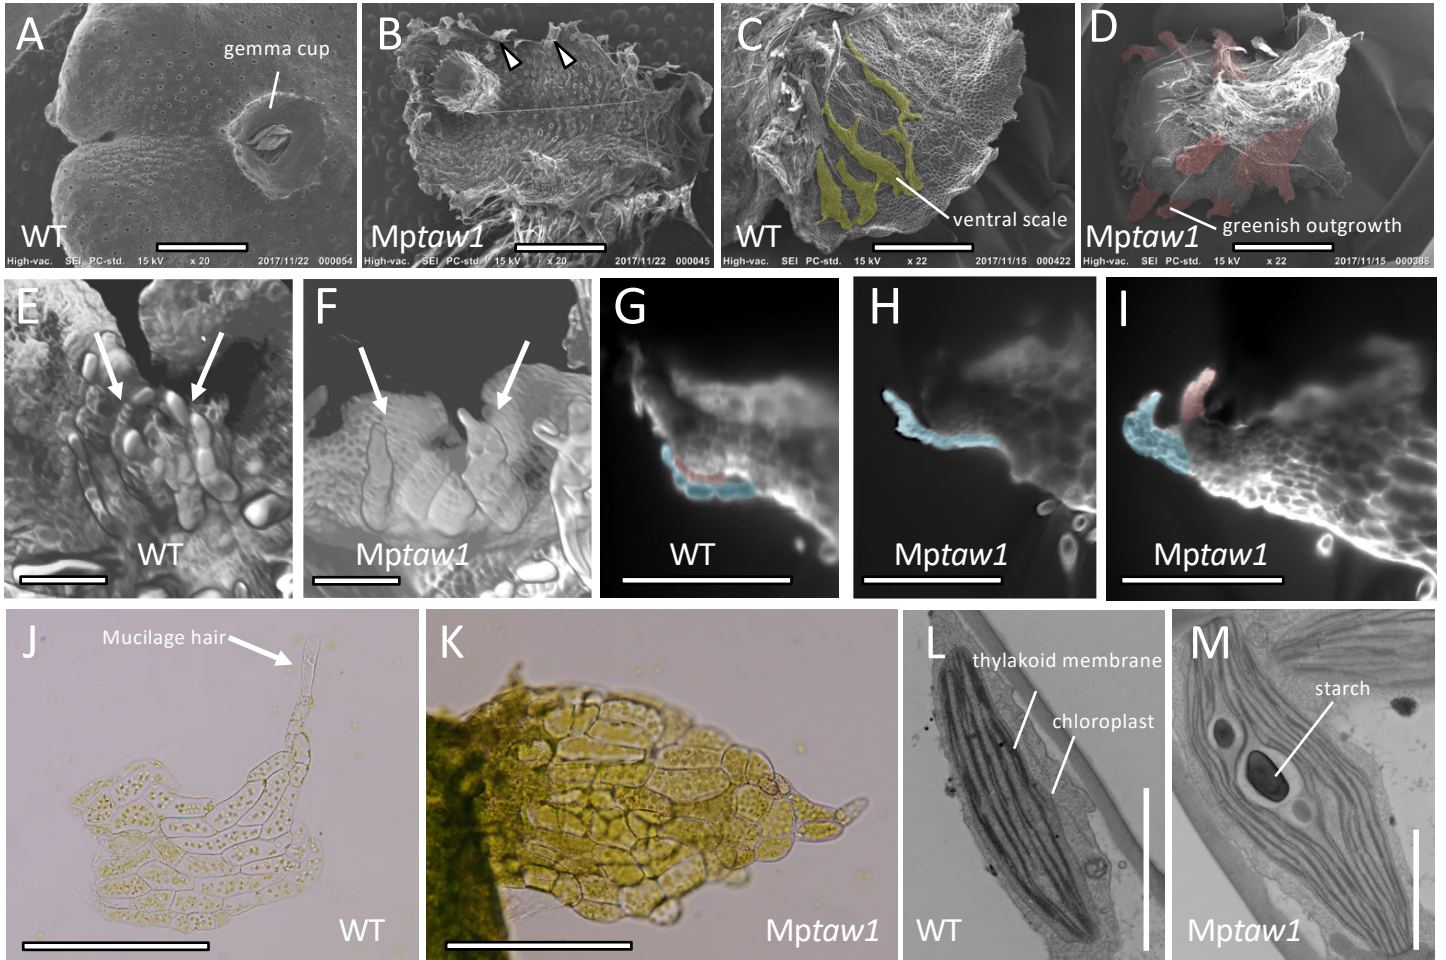

**Figure 2. MpTAW1 functions are required for specification of lateral organs**

(A-D) SEM images of WT (A and C) and the *Mptaw1* mutant (B and D) thalli. Dorsal (A and B) and ventral (C and D) sides of thalli are shown. Ventral scales in (C) and greenish outgrowth in (D) are highlighted in yellow and red, respectively.

(E-I) LSFM (Light sheet fluorescence microscopy) images of WT (E and G) and *Mptaw1* mutants (F, H and I). Observation of apical notch regions from the ventral side (E and F) revealed the role of MpTAW1 in specifying lateral organs as ventral scales (F). Vertical longitudinal optical sections (G-I) around apical notches identified accelerated cell division of lateral organs in *Mptaw1* mutants (H and I). Lateral organs are indicated by arrows in (E and F) and highlighted in red or blue in (G-I).

(J and K) Images of ventral scales in WT (J) and the corresponding tissues in *Mptaw1* mutants (K). Note that ventral scale cells are transformed into green tissues that lack mucilage hair cells in *Mptaw1* mutants. Mucilage hair in WT is indicated by an arrow in (J).

(L and M) TEM images of ventral scale cells in WT (L) and the corresponding cells in *Mptaw1* mutants (M). Note that ventral scale cells are transformed into photosynthetic cells in *Mptaw1* mutants.

Scale bars = 1.5 mm in (A-D), 150µm in (E and F), 300 µm in (G-I), 200 µm in (J and K) and 2 µm in (L and M).

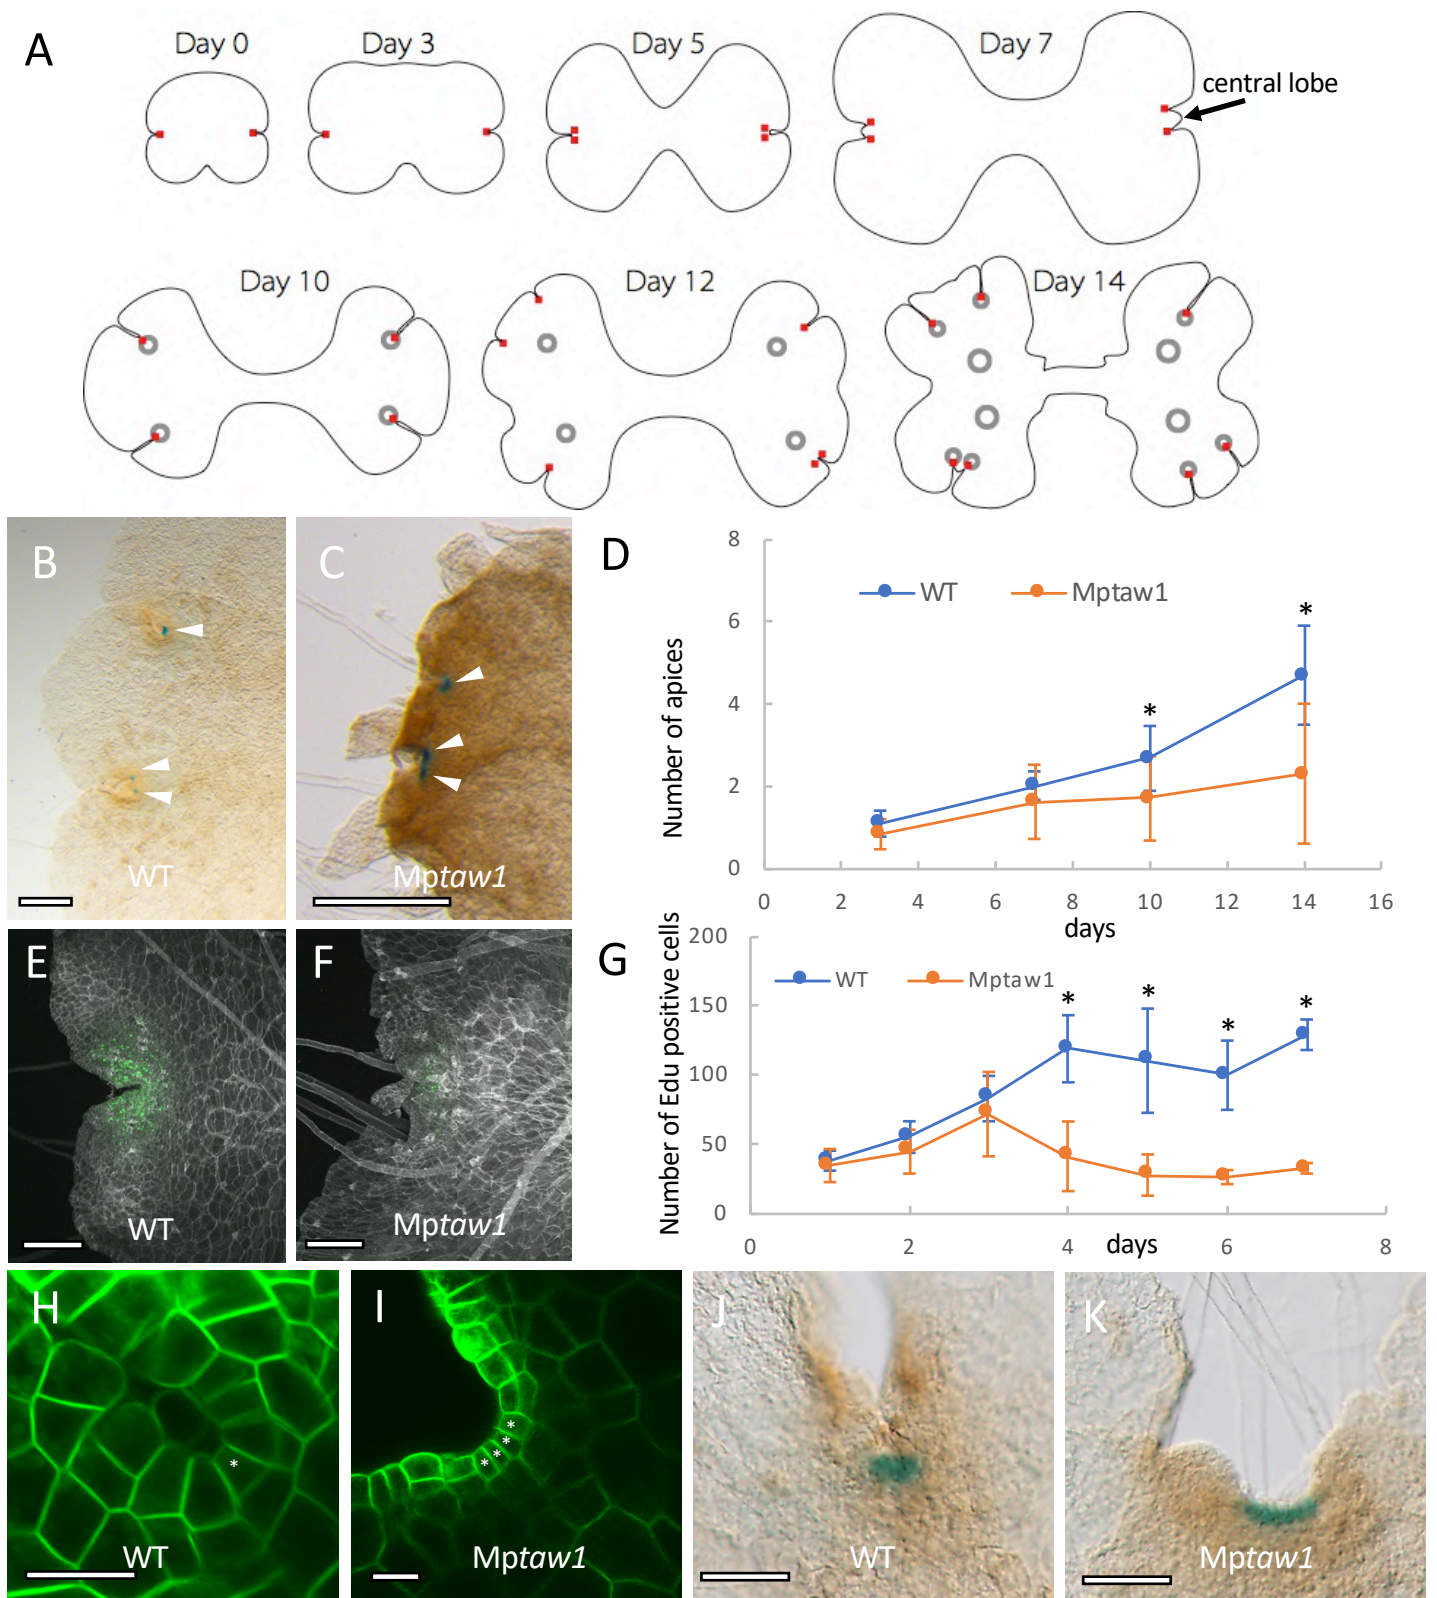

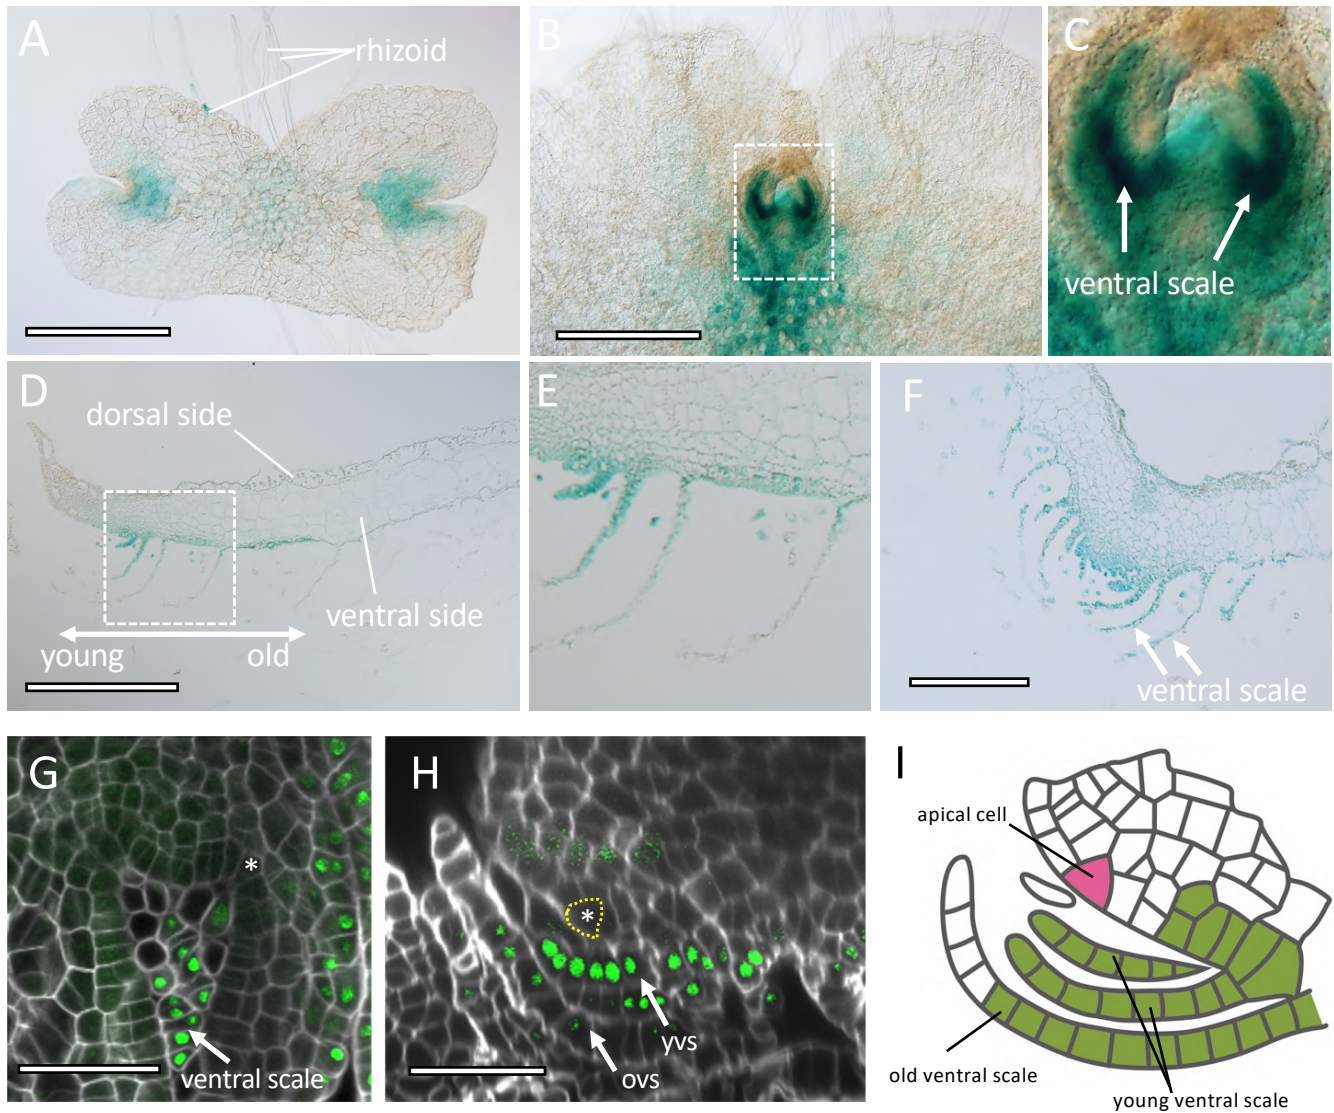

**Figure 4. MpTAW1 regulates lateral organ development cell-autonomously and meristem maintenance cell non-autonomously**  
 (A-C) GUS activity in ventral thalli of 4-d-old (A) and 10-d-old (B and C) *proMpTAW1:GUS*-expressing gemmalings. (C) is a close-up image of the dotted square depicted in (B).  
 (D-F) Cross-section of GUS-stained 10-d-old *proMpTAW1:GUS* gemmalings. (D and E) are vertical longitudinal sections and (F) is a vertical transverse section. (E) is a close-up image of the dotted square depicted in (D). “young” and “old” describe in (D) indicates the relative age of ventral scales.  
 (G and H) Functional eGFP-MpTAW1 proteins were not detected in apical meristems but were detected in ventral scales and the cells beneath the basal part of ventral scales. Confocal images of a horizontal optical section (G) and a vertical longitudinal optical section (H) of *Mptaw1* mutant gemmalings that express *proMpTAW1:eGFP-MpTAW1* constructs are shown. Cell walls were stained by calcofluor. Apical cells are indicated by asterisks and/or dotted yellow lines. “yvs” and “ovs” indicates young ventral scales and old ventral scales, respectively.  
 (I) Schematic of MpTAW1 protein localization around apical notches. MpTAW1 proteins are detected at ventral scales and the cells that are located around the basal part of ventral scales. Note that MpTAW1 protein is not present in apical cells. Green indicates cells that contain MpTAW1 protein. The apical cell is in pink.  
 Scale bars = 500  $\mu\text{m}$  in (A, B and D), 200  $\mu\text{m}$  in (F) and 50  $\mu\text{m}$  in (G and H).

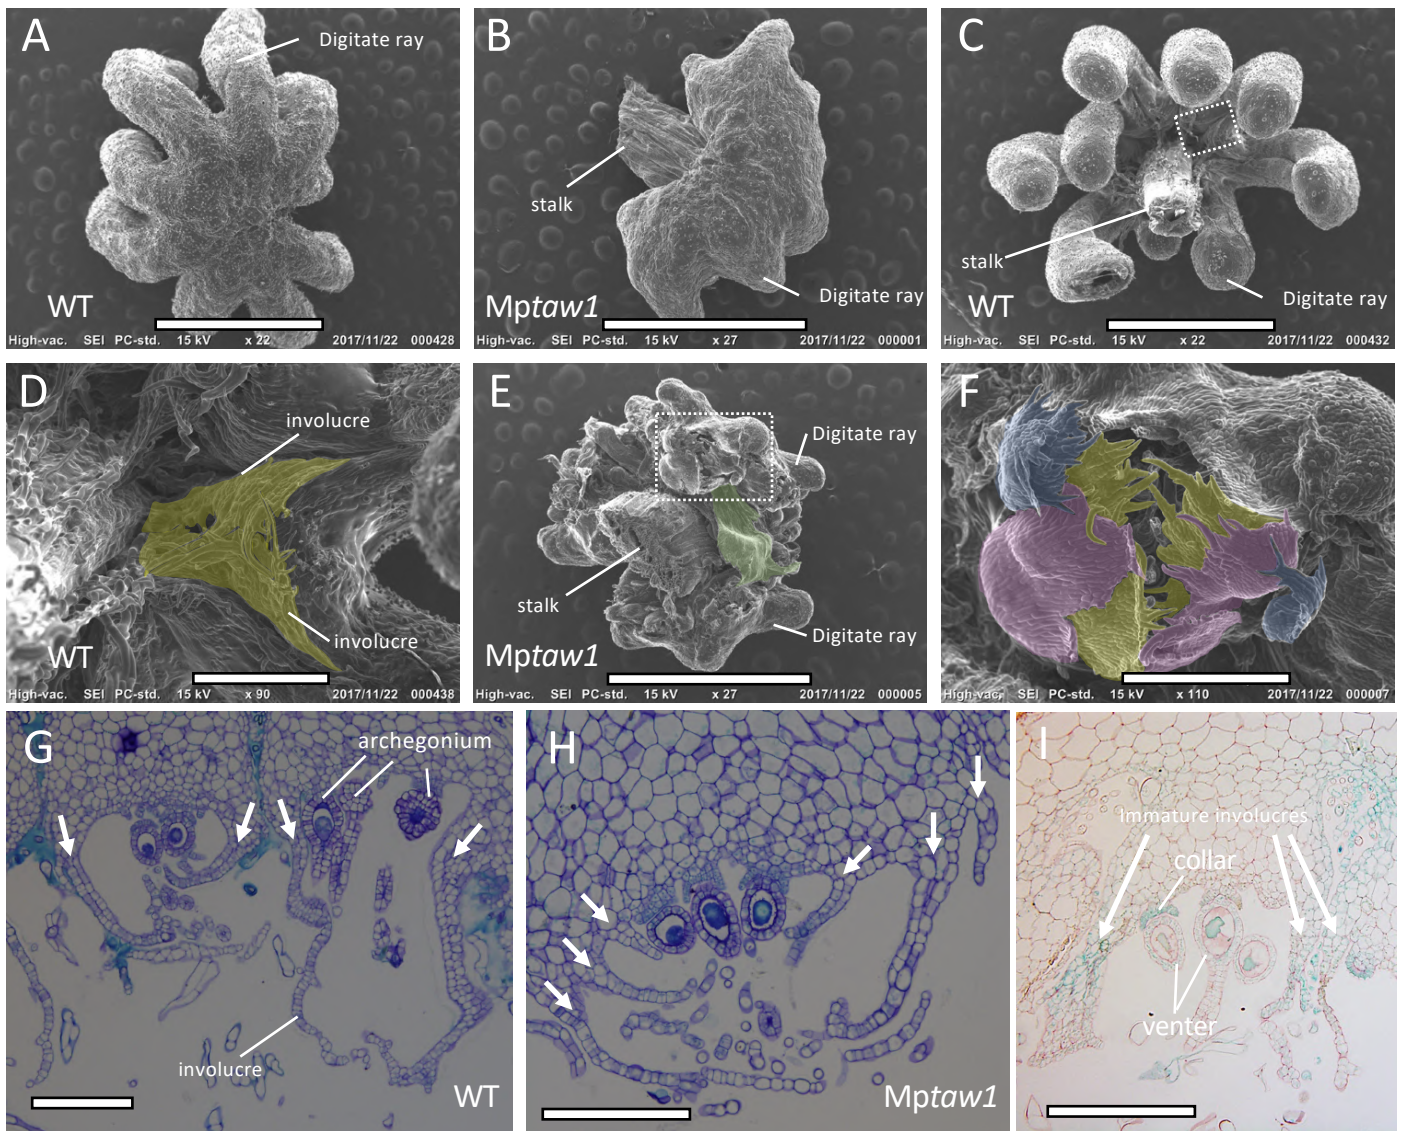

**Figure 5. MPTAW1 is necessary for the specification of lateral organ identity during reproductive growth**

(A and B) SEM images of the dorsal side of archegoniophores in WT Tak2 (A) and in *Mptaw1* mutants (B). Note that archegoniophores in *Mptaw1* mutants display shorter, malformed finger-like structures in place of digitate rays. (C-F) SEM images of the ventral side of archegoniophores in WT (C and D) and in *Mptaw1* mutants (E and F). (D) and (F) are magnified images of (C) and (E), respectively. Instead of a single pair of involucre as developed by the WT (C and D), three pairs of membranous structures developed in *Mptaw1* mutants (E and F). Enlarged leaf-like structures (highlighted in green) also developed in *Mptaw1* mutants (E). Involucre and the three pairs of membranous structures are highlighted in yellow, red and blue. (G and H) Cross-sections of archegonial receptacles at regions between the digitate rays in WT (G) and in *Mptaw1* mutants (H). Note the three pairs of ventral scale-like membranous structures in *Mptaw1* mutants. Arrows indicate involucre or ventral scale-like structures. (I) Cross-sections of GUS-stained archegoniophores that express *proMptAW1::GUS*. GUS activity was detected in immature involucre.

Scale bars = 2 mm in (A, B, C and E), 400  $\mu$ m in (D and F) and 200  $\mu$ m in (G, H and I).



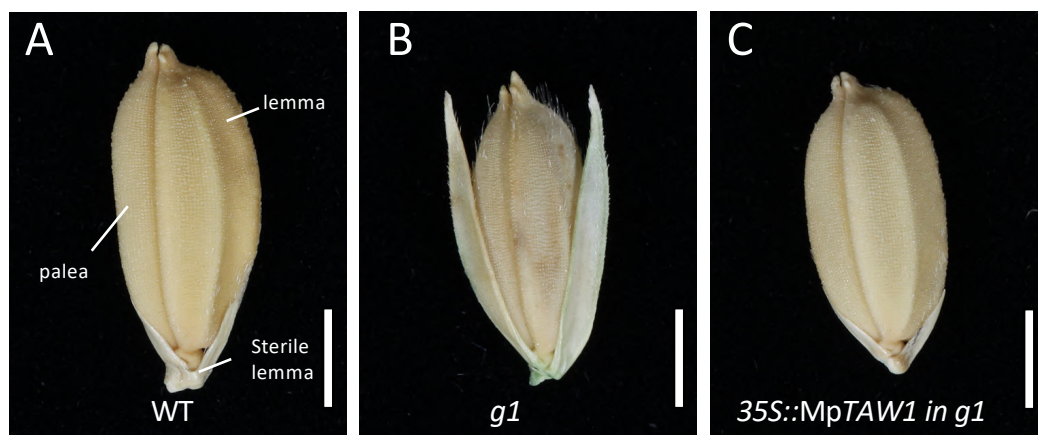

**Figure 6. Evolutionarily-conserved ALOG family proteins in Marchantia and in rice are co-opted to specify analogous lateral organs**

(A-C) Complementation of rice *alog* mutants with *MpTAW1*. Phenotypes of a WT (A), a *g1* mutant (B) and a *g1* mutant expressing the *35Spro::MpTAW1* construct (C) are shown.

Scale bars = 2 mm in (A, B and C).
